# Supplementary material for: The running kinematics of free-roaming giraffes, measured using a low cost unmanned aerial vehicle (UAV)
Source: PeerJ. 2019 Feb 12;7:e6312. doi: 10.7717/peerj.6312 (PMC6376938; doi:10.7717/peerj.6312)
Supplement: Supplemental Information 2 [file peerj-07-6312-s002.xlsx]

## Sheet: Stride parameters
Speed (ms-1)				Swing duration (s)		Stance duration (s)		Duty factor		Contralateral limb phase
4.46361	Stride duration (s)	Stride frequency (Hz)	Stride length (m)	Forelimb	Hindlimb	Forelimb	Hindlimb	Forelimb	Hindlimb	Forelimb	Hindlimb	Neck range of motion (°)	Pitch change (°)	Percent congruity of neck angle and body pitch
5.73027	0.891667	1.1215	4.01179	0.5	0.525	0.391667	0.366667	0.439252	0.411215	0.271028	0.214953	13.6252	17.2299	0.584906
3.37213	0.825	1.21212	3.94727	0.5	0.525	0.325	0.3	0.393939	0.363636	0.282828	0.191919	10.8986	17.0612	0.714286
4.0157	0.933333	1.07143	3.42769	0.458333	0.491667	0.475	0.441667	0.508929	0.473214	0.330357	0.232143	9.62154	13.302	0.432432
4.34166	0.908333	1.10092	3.14934	0.491667	0.541667	0.416667	0.366667	0.458716	0.40367	0.302752	0.201835	11.8807	15.4393	0.842593
4.34696	0.95	1.05263	3.987	0.525	0.6	0.425	0.35	0.447368	0.368421	0.315789	0.219298	12.4262	19.0753	0.59292
4.88712	0.891667	1.1215	3.66901	0.516667	0.516667	0.375	0.375	0.420561	0.420561	0.28972	0.224299	6.9148	11.9259	0.396226
4.86792	0.883333	1.13208	3.60569	0.5	0.508333	0.383333	0.375	0.433962	0.424528	0.292453	0.216981	7.90662	12.7304	0.695238
4.851	0.883333	1.13208	4.33756	0.516667	0.541667	0.366667	0.341667	0.415094	0.386792	0.301887	0.235849	14.5518	15.275	0.752381
5.23402	0.883333	1.13208	3.69465	0.516667	0.541667	0.366667	0.341667	0.415094	0.386792	0.292453	0.216981	13.1023	12.4134	0.885714
4.13483	0.875	1.14286	4.50526	0.525	0.541667	0.35	0.333333	0.4	0.380952	0.304762	0.238095	11.7789	13.3493	0.903846
5.42992	0.925	1.08108	3.89541	0.533333	0.541667	0.391667	0.383333	0.423423	0.414414	0.315315	0.225225	10.9813	13.4257	0.672727
6.73314	0.825	1.21212	3.57529	0.491667	0.55	0.333333	0.275	0.40404	0.333333	0.272727	0.20202	16.1472	15.5757	0.928571
5.24052	0.791667	1.26316	5.58401	0.516667	0.516667	0.275	0.275	0.347368	0.347368	0.263158	0.189474	11.0124	12.8646	0.914894
5.47306	0.85	1.17647	4.85276	0.516667	0.525	0.333333	0.325	0.392157	0.382353	0.284314	0.215686	8.07965	11.3422	0.405941
4.87624	0.816667	1.22449	4.14538	0.491667	0.533333	0.325	0.283333	0.397959	0.346939	0.285714	0.193878	7.05007	11.6933	0.752577
4.68365	0.866667	1.15385	4.30006	0.508333	0.5	0.358333	0.366667	0.413462	0.423077	0.298077	0.230769	12.7229	15.0145	0.650485
3.55698	0.891667	1.1215	4.15815	0.516667	0.558333	0.375	0.333333	0.420561	0.373832	0.280374	0.233645	8.32356	16.1981	0.679245
3.65339	0.966667	1.03448	3.45115	0.508333	0.541667	0.458333	0.425	0.474138	0.439655	0.37069	0.224138	7.74649	14.5663	0.608696
4.32188	1.00833	0.991736	3.84491	0.558333	0.583333	0.45	0.425	0.446281	0.421488	0.289256	0.256198	15.6393	14.869	0.3
5.51015	0.85	1.17647	3.4079	0.45	0.458333	0.4	0.391667	0.470588	0.460784	0.27451	0.205882	11.5531	13.7631	0.70297
4.8878	0.825	1.21212	5.06494	0.425	0.483333	0.4	0.341667	0.484848	0.414141	0.272727	0.212121	8.74923	12.6897	0.908163
6.82503	0.875	1.14286	4.26271	0.533333	0.541667	0.341667	0.333333	0.390476	0.380952	0.285714	0.2	10.7306	13.8438	0.855769
6.89234	0.85	1.17647	4.7736	0.5	0.55	0.35	0.3	0.411765	0.352941	0.303922	0.186275	9.7695	9.72653	0.930693
6.47213	0.833333	1.2	5.92583	0.508333	0.541667	0.325	0.291667	0.39	0.35	0.27	0.17	10.9423	12.0966	0.656566
	0.85	1.17647	4.59744	0.508333	0.525	0.341667	0.325	0.401961	0.382353	0.264706	0.176471	10.4839	14.1518	0.821782
